# Supplementary material for: Analgesic Efficacy of Ketoprofen Transdermal Patch versus Ibuprofen Oral Tablet on Postendodontic Pain in Patients with Irreversible Pulpitis: A Randomized Clinical Trial
Source: Hindawi journal article supplement (doi:10.1155/2023/8549655), 2023-06-07
Supplement: f1 [file 8549655.f1.pdf]

| code | id | teeth | drug | Anxiety | Pain.before |
|------|----|-------|------|---------|-------------|
| 1    | 1  | 6     | 1    | 2       | 4           |
| 1    | 2  | 6     | 1    | 0       | 7           |
| 1    | 3  | 6     | 1    | 7       | 7           |
| 1    | 4  | 6     | 1    | 1       | 4           |
| 1    | 5  | 6     | 1    | 6       | 10          |
| 1    | 6  | 6     | 1    | 3       | 8           |
| 1    | 7  | 6     | 1    | 3       | 7           |
| 1    | 8  | 6     | 1    | 3       | 5           |
| 2    | 9  | 6     | 1    | 5       | 3           |
| 2    | 10 | 6     | 1    | 2       | 5           |
| 2    | 11 | 6     | 1    | 10      | 10          |
| 2    | 12 | 6     | 1    | 5       | 4           |
| 2    | 13 | 6     | 1    | 7       | 8           |
| 2    | 14 | 6     | 1    | 7       | 7           |
| 2    | 15 | 6     | 1    | 2       | 8           |
| 2    | 16 | 6     | 1    | 3       | 9           |
| 3    | 17 | 6     | 2    | 0       | 4           |
| 3    | 18 | 6     | 2    | 5       | 3           |
| 3    | 19 | 6     | 2    | 4       | 8           |
| 3    | 20 | 6     | 2    | 2       | 8           |
| 3    | 21 | 6     | 2    | 8       | 7           |
| 3    | 22 | 6     | 2    | 3       | 6           |
| 3    | 23 | 6     | 2    | 5       | 5           |
| 3    | 24 | 6     | 2    | 0       | 5           |
| 4    | 25 | 6     | 2    | 4       | 6           |
| 4    | 26 | 6     | 2    | 0       | 4           |
| 4    | 27 | 6     | 2    | 2       | 8           |
| 4    | 28 | 6     | 2    | 3       | 4           |
| 4    | 29 | 6     | 2    | 6       | 4           |
| 4    | 30 | 6     | 2    | 2       | 5           |
| 4    | 31 | 6     | 2    | 6       | 8           |
| 4    | 32 | 6     | 2    | 5       | 4           |
| 5    | 33 | 7     | 1    | 7       | 9           |
| 5    | 34 | 7     | 1    | 0       | 4           |
| 5    | 35 | 7     | 1    | 5       | 10          |
| 5    | 36 | 7     | 1    | 3       | 8           |
| 5    | 37 | 7     | 1    | 6       | 7           |

|   |    |   |   |   |    |
|---|----|---|---|---|----|
| 5 | 38 | 7 | 1 | 5 | 6  |
| 5 | 39 | 7 | 1 | 0 | 5  |
| 5 | 40 | 7 | 1 | 1 | 9  |
| 6 | 41 | 7 | 1 | 5 | 5  |
| 6 | 42 | 7 | 1 | 4 | 10 |
| 6 | 43 | 7 | 1 | 6 | 7  |
| 6 | 44 | 7 | 1 | 5 | 5  |
| 6 | 45 | 7 | 1 | 6 | 5  |
| 6 | 46 | 7 | 1 | 5 | 9  |
| 6 | 47 | 7 | 1 | 2 | 4  |
| 6 | 48 | 7 | 1 | 6 | 10 |
| 7 | 49 | 7 | 2 | 6 | 5  |
| 7 | 50 | 7 | 2 | 0 | 4  |
| 7 | 51 | 7 | 2 | 0 | 4  |
| 7 | 52 | 7 | 2 | 7 | 7  |
| 7 | 53 | 7 | 2 | 5 | 10 |
| 7 | 54 | 7 | 2 | 7 | 7  |
| 7 | 55 | 7 | 2 | 5 | 4  |
| 7 | 56 | 7 | 2 | 3 | 5  |
| 8 | 57 | 7 | 2 | 8 | 8  |
| 8 | 58 | 7 | 2 | 2 | 4  |
| 8 | 59 | 7 | 2 | 2 | 5  |
| 8 | 60 | 7 | 2 | 4 | 4  |
| 8 | 61 | 7 | 2 | 6 | 6  |
| 8 | 62 | 7 | 2 | 7 | 9  |
| 8 | 63 | 7 | 2 | 5 | 10 |
| 8 | 64 | 7 | 2 | 0 | 6  |

| Pain.2hour | Pain.4hour | Pain.8hour | Pain.12hour | Pain.24hour | Pain.48hour |
|------------|------------|------------|-------------|-------------|-------------|
| 2          | 2          | 1          | 0           | 0           | 0           |
| 9          | 3          | 2          | 0           | 0           | 0           |
| 7          | 5          | 3          | 3           | 0           | 0           |
| 0          | 0          | 0          | 0           | 0           | 0           |
| 5          | 6          | 5          | 3           | 3           | 1           |
| 5          | 7          | 8          | 5           | 1           | 0           |
| 2          | 1          | 0          | 0           | 0           | 0           |
| 1          | 1          | 0          | 0           | 0           | 0           |
| 2          | 0          | 0          | 0           | 0           | 0           |
| 0          | 0          | 0          | 0           | 0           | 0           |
| 8          | 10         | 5          | 2           | 1           | 0           |
| 4          | 0          | 0          | 0           | 0           | 0           |
| 8          | 5          | 5          | 5           | 2           | 0           |
| 2          | 3          | 2          | 1           | 0           | 0           |
| 0          | 0          | 0          | 0           | 0           | 0           |
| 2          | 2          | 1          | 1           | 0           | 0           |
| 1          | 0          | 0          | 0           | 0           | 0           |
| 4          | 4          | 2          | 0           | 0           | 0           |
| 1          | 1          | 0          | 0           | 0           | 0           |
| 2          | 2          | 2          | 1           | 1           | 0           |
| 7          | 4          | 1          | 0           | 0           | 0           |
| 2          | 0          | 0          | 0           | 0           | 0           |
| 5          | 4          | 1          | 0           | 0           | 0           |
| 2          | 3          | 2          | 1           | 0           | 0           |
| 4          | 2          | 0          | 0           | 0           | 0           |
| 1          | 1          | 1          | 1           | 1           | 0           |
| 4          | 6          | 2          | 1           | 0           | 0           |
| 5          | 3          | 3          | 3           | 3           | 1           |
| 2          | 0          | 0          | 0           | 0           | 0           |
| 2          | 0          | 0          | 0           | 0           | 0           |
| 6          | 4          | 1          | 1           | 0           | 0           |
| 8          | 5          | 5          | 5           | 2           | 2           |
| 4          | 5          | 5          | 3           | 2           | 0           |
| 2          | 0          | 0          | 0           | 0           | 0           |
| 8          | 7          | 3          | 3           | 3           | 1           |
| 3          | 1          | 0          | 0           | 0           | 0           |
| 6          | 4          | 4          | 1           | 1           | 1           |

|   |    |   |   |   |   |
|---|----|---|---|---|---|
| 6 | 0  | 0 | 0 | 0 | 0 |
| 2 | 1  | 0 | 0 | 0 | 0 |
| 3 | 5  | 5 | 3 | 1 | 0 |
| 4 | 6  | 6 | 3 | 2 | 1 |
| 7 | 10 | 5 | 1 | 0 | 0 |
| 5 | 4  | 2 | 2 | 2 | 0 |
| 0 | 0  | 0 | 0 | 0 | 0 |
| 4 | 4  | 6 | 2 | 0 | 0 |
| 2 | 2  | 1 | 1 | 0 | 0 |
| 0 | 0  | 0 | 0 | 0 | 0 |
| 2 | 5  | 5 | 4 | 2 | 1 |
| 0 | 0  | 0 | 0 | 0 | 0 |
| 5 | 4  | 5 | 3 | 0 | 0 |
| 0 | 0  | 0 | 0 | 0 | 0 |
| 1 | 0  | 0 | 0 | 0 | 0 |
| 6 | 6  | 2 | 1 | 1 | 0 |
| 8 | 5  | 5 | 3 | 1 | 0 |
| 1 | 0  | 0 | 0 | 0 | 0 |
| 3 | 1  | 0 | 0 | 0 | 0 |
| 3 | 4  | 6 | 3 | 2 | 0 |
| 1 | 0  | 0 | 0 | 0 | 0 |
| 0 | 0  | 0 | 0 | 0 | 0 |
| 5 | 7  | 5 | 2 | 0 | 0 |
| 4 | 6  | 3 | 1 | 0 | 0 |
| 6 | 5  | 2 | 1 | 0 | 0 |
| 6 | 6  | 5 | 3 | 1 | 1 |
| 4 | 5  | 4 | 1 | 1 | 0 |
